# Supplementary material for: Predicted Coverage and Immuno-Safety of a Recombinant C-Repeat Region Based Streptococcus pyogenes Vaccine Candidate
Source: PubMed Central journal article supplement (PMC4911098; doi:10.1371/journal.pone.0156639), 2016-06-16
Supplement: pone.0156639.s004.pdf [file pone.0156639.s004.pdf]

**Supplementary Table 1.** Distribution of J14<sub>i</sub>-variants in different M-types<sup>a</sup>.

| emm-type | CN2   | CN1    | CRU1   | CRU2   | CRU3  |
|----------|-------|--------|--------|--------|-------|
| 1        | J14.2 | J14.2  | J14.2  | J14.2  | J14.0 |
| 1-2      | -     | -      | J14.2  | J14.2  | J14.0 |
| 1-4      | -     | -      | J14.2  | J14.2  | J14.0 |
| 2        | -     | -      | -      | J14.29 | J14.1 |
| 3        | -     | J14.84 | J14.5  | J14.2  | J14.0 |
| 4        | -     | -      | J14.1  | J14.1  | J14.1 |
| 5        | -     | -      | J14.4  | J14.2  | J14.0 |
| 6        | -     | -      | J14.4  | J14.2  | J14.0 |
| 8        | -     | -      | J14.8  | J14.1  | J14.1 |
| 9        | -     | -      | J14.29 | J14.1  | J14.1 |
| 11       | -     | -      | J14.36 | J14.1  | J14.1 |
| 12       | -     | J14.84 | J14.16 | J14.2  | J14.0 |
| 13       | -     | -      | J14.8  | J14.1  | J14.1 |
| 14       | -     | -      | J14.4  | J14.4  | J14.0 |
| 15       | -     | -      | J14.29 | J14.1  | J14.1 |
| 18       | -     | -      | J14.4  | J14.2  | J14.1 |
| 19       | -     | -      | J14.4  | J14.2  | J14.0 |
| 22       | -     | -      | J14.8  | J14.1  | J14.1 |
| 23       | -     | J14.4  | J14.4  | J14.2  | J14.0 |
| 24       | -     | -      | J14.4  | J14.4  | J14.0 |
| 25       | -     | -      | J14.29 | J14.1  | J14.1 |
| 26       | -     | -      | J14.4  | J14.2  | J14.0 |
| 27       | -     | -      | -      | J14.1  | J14.1 |
| 28       | -     | -      | J14.29 | J14.41 | J14.1 |
| 29       | -     | -      | J14.4  | J14.4  | J14.0 |
| 30       | -     | -      | J14.4  | J14.4  | J14.0 |
| 31       | -     | J14.84 | J14.16 | J14.2  | J14.0 |
| 32       | -     | -      | J14.2  | J14.2  | J14.0 |
| 33       | -     | -      | J14.2  | J14.2  | J14.0 |
| 36       | -     | -      | J14.4  | J14.2  | J14.0 |
| 39       | -     | -      | J14.84 | J14.4  | J14.0 |
| 41       | -     | -      | J14.2  | J14.2  | J14.0 |
| 42       | -     | -      | J14.53 | J14.1  | J14.1 |
| 43       | -     | -      | J14.2  | J14.2  | J14.0 |
| 44       | -     | -      | J14.8  | J14.1  | J14.1 |
| 48       | -     | -      | J14.36 | J14.1  | J14.1 |
| 49       | -     | -      | J14.1  | J14.1  | J14.1 |
| 50       | -     | -      | J14.8  | J14.8  | J14.1 |
| 52       | -     | -      | J14.2  | J14.2  | J14.0 |
| 53       | -     | -      | J14.4  | J14.2  | J14.0 |
| 54       | -     | -      | J14.4  | J14.2  | J14.0 |

| emm-type | CN2    | CN1    | CRU1   | CRU2   | CRU3   |
|----------|--------|--------|--------|--------|--------|
| 55       | -      | -      | -      | J14.2  | J14.0  |
| 56       | -      | -      | J14.2  | J14.1  | J14.1  |
| 57       | J14.46 | J14.46 | J14.4  | J14.2  | J14.0  |
| 58       | -      | -      | J14.29 | J14.1  | J14.1  |
| 59       | -      | -      | J14.53 | J14.1  | J14.1  |
| 60       | -      | -      | J14.12 | J14.1  | J14.1  |
| 63       | -      | -      | J14.69 | J14.1  | J14.1  |
| 64       | -      | -      | J14.2  | J14.2  | J14.0  |
| 65       | -      | -      | J14.36 | J14.1  | J14.1  |
| 66       | -      | -      | J14.1  | J14.1  | J14.1  |
| 67       | -      | -      | J14.36 | J14.36 | J14.1  |
| 68       | -      | -      | J14.8  | J14.1  | J14.1  |
| 70       | -      | -      | J14.2  | J14.1  | J14.1  |
| 71       | -      | -      | J14.4  | J14.4  | J14.0  |
| 73       | -      | -      | J14.8  | J14.1  | J14.1  |
| 74       | -      | -      | J14.4  | J14.4  | J14.0  |
| 75       | -      | -      | J14.36 | J14.1  | J14.1  |
| 76       | -      | -      | J14.29 | J14.1  | J14.1  |
| 77       | -      | -      | J14.8  | J14.1  | J14.1  |
| 78       | -      | -      | J14.12 | J14.1  | J14.1  |
| 79       | -      | -      | J14.29 | J14.1  | J14.41 |
| 80       | -      | -      | J14.2  | J14.2  | J14.0  |
| 81       | -      | -      | J14.53 | J14.1  | J14.1  |
| 82       | -      | -      | J14.72 | J14.1  | J14.1  |
| 83       | -      | J14.2  | J14.2  | J14.2  | J14.0  |
| 84       | -      | -      | J14.29 | J14.1  | J14.1  |
| 85       | -      | -      | J14.53 | J14.1  | J14.1  |
| 86       | -      | -      | J14.2  | J14.2  | J14.0  |
| 87       | -      | -      | J14.8  | J14.1  | J14.1  |
| 88       | -      | -      | J14.29 | J14.1  | J14.1  |
| 89       | -      | -      | J14.1  | J14.1  | J14.1  |
| 90       | -      | -      | J14.29 | J14.1  | J14.1  |
| 91       | -      | -      | J14.2  | J14.2  | J14.0  |
| 92       | -      | -      | J14.1  | J14.1  | J14.1  |
| 93       | -      | -      | J14.2  | J14.2  | J14.0  |
| 94       | -      | J14.12 | J14.12 | J14.1  | J14.1  |
| 95       | -      | -      | -      | J14.2  | J14.1  |
| 96       | -      | -      | J14.8  | J14.1  | J14.1  |
| 97       | -      | -      | J14.2  | J14.57 | J14.0  |
| 98       | -      | -      | J14.2  | J14.2  | J14.0  |
| 99       | -      | -      | J14.36 | j14.1  | J14.1  |
| 100      | -      | -      | -      | J14.4  | J14.0  |
| 101      | -      | -      | J14.2  | J14.2  | J14.0  |

| emm-type | CN2 | CN1   | CRU1   | CRU2   | CRU3   |
|----------|-----|-------|--------|--------|--------|
| 102      | -   | -     | J14.29 | J14.1  | J14.1  |
| 103      | -   | -     | J14.8  | J14.1  | J14.1  |
| 104      | -   | -     | J14.1  | J14.1  | J14.1  |
| 105      | -   | -     | -      | J14.4  | J14.0  |
| 106      | -   | -     | J14.8  | J14.1  | J14.1  |
| 107      | -   | -     | J14.29 | J14.1  | J14.41 |
| 108      | -   | -     | J14.2  | J14.2  | J14.0  |
| 109      | -   | -     | J14.8  | J14.1  | J14.1  |
| 110      | -   | -     | J14.8  | J14.1  | J14.1  |
| 111      | -   | -     | -      | -      | J14.0  |
| 112      | -   | -     | J14.29 | J14.1  | J14.1  |
| 113      | -   | -     | J14.8  | J14.1  | J14.1  |
| 114      | -   | -     | J14.29 | J14.1  | J14.1  |
| 115      | -   | -     | J14.4  | J14.2  | J14.0  |
| 116      | -   | -     | J14.2  | J14.2  | J14.0  |
| 117      | -   | -     | J14.8  | J14.1  | J14.1  |
| 118      | -   | -     | J14.79 | J14.1  | J14.80 |
| 119      | -   | -     | J14.2  | J14.1  | J14.1  |
| 120      | -   | -     | J14.2  | J14.1  | J14.1  |
| 121      | -   | -     | J14.1  | J14.1  | J14.1  |
| 122      | -   | -     | -      | J14.4  | J14.2  |
| 123      | -   | J14.4 | J14.2  | J14.2  | J14.0  |
| 124      | -   | -     | J14.29 | J14.1  | J14.1  |
| emm134   | -   | -     | -      | J14.12 | J14.40 |
| emm137   | -   | -     | -      | -      | J14.12 |
| emm174   | -   | -     | -      | J14.12 | J14.40 |
| emm205   | -   | -     | -      | J14.12 | J14.40 |
| emm211   | -   | -     | -      | J14.12 | J14.40 |
| st106M   | -   | -     | J14.12 | J14.12 | J14.1  |
| st11014  | -   | -     | J14.12 | J14.1  | J14.1  |
| st1207   | -   | -     | J14.29 | J14.1  | J14.1  |
| st1389   | -   | -     | J14.8  | J14.1  | J14.1  |
| st1692   | -   | -     | -      | J14.2  | J14.0  |
| st1731   | -   | -     | J14.29 | J14.1  | J14.1  |
| st1815   | -   | -     | J14.12 | J14.1  | J14.1  |
| st2037   | -   | -     | J14.36 | J14.1  | J14.1  |
| st212    | -   | -     | J14.29 | J14.1  | J14.1  |
| st213    | -   | -     | J14.12 | J14.1  | J14.1  |
| st2147   | -   | -     | J14.55 | J14.1  | J14.1  |
| st22     | -   | -     | J14.2  | J14.2  | J14.0  |
| st221    | -   | -     | -      | J14.2  | J14.0  |
| st2460   | -   | -     | J14.29 | J14.1  | J14.1  |
| st2861UK | -   | -     | J14.53 | J14.1  | J14.1  |

| emm-type | CN2 | CN1    | CRU1   | CRU2   | CRU3   |
|----------|-----|--------|--------|--------|--------|
| st2904   | -   | -      | J14.58 | J14.1  | J14.1  |
| st2911   | -   | -      | J14.2  | J14.2  | J14.0  |
| st2917   | -   | J14.53 | J14.53 | J14.1  | J14.1  |
| st2926   | -   | -      | J14.2  | J14.2  | J14.1  |
| st2940   | -   | -      | J14.2  | J14.2  | J14.0  |
| st369    | -   | -      | J14.62 | J14.1  | J14.1  |
| st3757   | -   | -      | J14.2  | J14.1  | J14.1  |
| st3765   | -   | -      | -      | J14.2  | J14.0  |
| st38     | -   | -      | J14.2  | J14.57 | J14.0  |
| st3850   | -   | -      | J14.2  | J14.2  | J14.1  |
| st4119   | -   | -      | J14.4  | J14.4  | J14.0  |
| st412    | -   | -      | J14.2  | J14.2  | J14.0  |
| st6030   | -   | -      | J14.4  | J14.2  | J14.0  |
| st6166B  | -   | -      | J14.4  | J14.2  | J14.0  |
| st62     | -   | -      | J14.2  | J14.57 | J14.0  |
| st6735   | -   | -      | J14.8  | J14.1  | J14.1  |
| st7323   | -   | -      | J14.53 | J14.1  | J14.1  |
| st7395   | -   | J14.2  | J14.2  | J14.2  | J14.0  |
| st7700   | -   | -      | J14.4  | J14.4  | J14.0  |
| st804    | -   | -      | -      | J14.4  | J14.1  |
| st809    | -   | -      | J14.4  | J14.2  | J14.0  |
| st818    | -   | -      | J14.4  | J14.2  | J14.0  |
| st854    | -   | -      | J14.4  | J14.2  | J14.0  |
| st9505   | -   | J14.8  | J14.8  | J14.8  | J14.1  |
| stck249  | -   | -      | -      | -      | J14.0  |
| stck401  | -   | -      | -      | J14.2  | J14.0  |
| std432   | -   | -      | J14.2  | J14.1  | J14.1  |
| stD631   | -   | -      | J14.2  | J14.2  | J14.64 |
| stD633   | -   | -      | J14.2  | J14.2  | J14.0  |
| stg4222  | -   | J14.62 | J14.4  | J14.60 | J14.0  |
| stg4545  | -   | -      | J14.4  | J14.2  | J14.0  |
| stg480   | -   | J14.46 | J14.4  | J14.60 | J14.0  |
| stg6     | -   | J14.4  | J14.4  | J14.60 | J14.0  |
| stg653   | -   | -      | J14.4  | J14.2  | J14.59 |
| stg866   | -   | -      | J14.2  | J14.2  | J14.0  |
| stil103  | -   | -      | J14.2  | J14.2  | J14.0  |
| stil62   | -   | -      | -      | J14.2  | J14.0  |
| stknb1   | -   | -      | J14.35 | J14.1  | J14.1  |
| stmd216  | -   | -      | -      | J14.2  | J14.0  |
| stn165   | -   | -      | J14.62 | J14.2  | J14.0  |
| stns1033 | -   | -      | J14.2  | J14.2  | J14.0  |
| stns292  | -   | -      | J14.35 | J14.1  | J14.1  |
| stns554  | -   | -      | J14.58 | J14.1  | J14.1  |

| <b>emm-type</b> | <b>CN2</b> | <b>CN1</b> | <b>CRU1</b> | <b>CRU2</b> | <b>CRU3</b> |
|-----------------|------------|------------|-------------|-------------|-------------|
| stns90          | -          | -          | J14.4       | J14.4       | J14.0       |
| stpa57          | -          | -          | -           | J14.2       | J14.0       |
| sts104          | -          | J14.12     | J14.29      | J14.29      | J14.0       |

<sup>a</sup>J14i variant present in SV1 are shown in colour
